# Supplementary material for: Effects of Automation and Fatigue on Drivers from Various Age Groups
Source: MDPI journal article supplement (doi:10.3390/safety8020030), 2022-04-11
Supplement: s1 [file s1]

## Supplementary Information

**Table S1.** Workload self-ratings of female and male drivers from both age groups related to manual and automated driving in the rested and fatigued conditions.

| Condition       | Driving Mode | Age Group 20-49 Years |       |        |       | Age Group 50-85 Years |       |        |       |
|-----------------|--------------|-----------------------|-------|--------|-------|-----------------------|-------|--------|-------|
|                 |              | Male                  |       | Female |       | Male                  |       | Female |       |
|                 |              | Mean                  | SD    | Mean   | SD    | Mean                  | SD    | Mean   | SD    |
| Mental Demand   |              |                       |       |        |       |                       |       |        |       |
| Rested          | Automated    | 0.873                 | 0.127 | 0.735  | 0.144 | 1.025                 | 0.133 | 0.956  | 0.117 |
|                 | Manual       | 1.531                 | 0.130 | 1.107  | 0.147 | 1.414                 | 0.136 | 1.221  | 0.120 |
| Fatigued        | Automated    | 1.112                 | 0.151 | 1.064  | 0.170 | 0.821                 | 0.158 | 1.012  | 0.139 |
|                 | Manual       | 1.483                 | 0.138 | 1.413  | 0.156 | 1.405                 | 0.144 | 1.410  | 0.127 |
| Physical Demand |              |                       |       |        |       |                       |       |        |       |
| Rested          | Automated    | 0.721                 | 0.122 | 0.530  | 0.138 | 0.613                 | 0.128 | 0.696  | 0.113 |
|                 | Manual       | 1.209                 | 0.126 | 0.898  | 0.142 | 1.008                 | 0.132 | 1.186  | 0.116 |
| Fatigued        | Automated    | 0.828                 | 0.142 | 0.661  | 0.160 | 0.610                 | 0.149 | 0.704  | 0.131 |
|                 | Manual       | 1.308                 | 0.132 | 1.131  | 0.149 | 1.121                 | 0.138 | 1.180  | 0.122 |
| Temporal Demand |              |                       |       |        |       |                       |       |        |       |
| Rested          | Automated    | 0.610                 | 0.124 | 0.629  | 0.140 | 0.883                 | 0.129 | 0.821  | 0.114 |
|                 | Manual       | 0.741                 | 0.124 | 0.783  | 0.140 | 0.987                 | 0.130 | 1.172  | 0.114 |
| Fatigued        | Automated    | 0.613                 | 0.140 | 0.639  | 0.158 | 0.731                 | 0.147 | 0.748  | 0.129 |
|                 | Manual       | 1.037                 | 0.141 | 0.977  | 0.159 | 1.465                 | 0.147 | 1.143  | 0.130 |
| Performance     |              |                       |       |        |       |                       |       |        |       |
| Rested          | Automated    | 1.365                 | 0.163 | 1.651  | 0.184 | 1.220                 | 0.170 | 1.245  | 0.150 |
|                 | Manual       | 1.829                 | 0.107 | 1.914  | 0.121 | 1.681                 | 0.112 | 1.738  | 0.099 |
| Fatigued        | Automated    | 1.265                 | 0.171 | 1.386  | 0.193 | 1.328                 | 0.179 | 1.287  | 0.158 |
|                 | Manual       | 1.567                 | 0.111 | 1.879  | 0.125 | 1.596                 | 0.116 | 1.770  | 0.102 |
| Effort          |              |                       |       |        |       |                       |       |        |       |
| Rested          | Automated    | 1.052                 | 0.150 | 0.761  | 0.169 | 1.013                 | 0.156 | 1.101  | 0.138 |
|                 | Manual       | 1.481                 | 0.127 | 1.192  | 0.143 | 1.303                 | 0.133 | 1.373  | 0.117 |
| Fatigued        | Automated    | 1.052                 | 0.169 | 1.183  | 0.192 | 1.228                 | 0.177 | 0.990  | 0.156 |
|                 | Manual       | 1.783                 | 0.129 | 1.620  | 0.146 | 1.745                 | 0.135 | 1.452  | 0.119 |
| Frustration     |              |                       |       |        |       |                       |       |        |       |
| Rested          | Automated    | 1.155                 | 0.166 | 1.194  | 0.188 | 1.241                 | 0.174 | 1.289  | 0.154 |
|                 | Manual       | 1.206                 | 0.146 | 1.095  | 0.165 | 1.017                 | 0.153 | 0.997  | 0.135 |
| Fatigued        | Automated    | 1.252                 | 0.165 | 1.460  | 0.186 | 1.068                 | 0.172 | 1.108  | 0.152 |
|                 | Manual       | 1.421                 | 0.156 | 1.372  | 0.176 | 1.392                 | 0.163 | 1.259  | 0.144 |

Note: Data transformation by  $\ln(x+1)$  was used before calculating ANOVA. SD - Standard Deviation

**Table S2.** PERCLOS of female and male drivers from both age groups related to manual and automated driving in the rested and fatigued conditions.

| Condition        | Driving Mode | Age Group 20-49 Years |       |        |       | Age Group 50-85 Years |       |        |       |
|------------------|--------------|-----------------------|-------|--------|-------|-----------------------|-------|--------|-------|
|                  |              | Male                  |       | Female |       | Male                  |       | Female |       |
|                  |              | Mean                  | SD    | Mean   | SD    | Mean                  | SD    | Mean   | SD    |
| Minimal PERCLOS  |              |                       |       |        |       |                       |       |        |       |
| Rested           | Automated    | 0.007                 | 0.004 | 0.004  | 0.004 | 0.004                 | 0.004 | 0.011  | 0.004 |
|                  | Manual       | 0.001                 | 0.002 | 0.005  | 0.002 | 0.006                 | 0.002 | 0.005  | 0.002 |
| Fatigued         | Automated    | 0.006                 | 0.004 | 0.010  | 0.004 | 0.008                 | 0.004 | 0.010  | 0.004 |
|                  | Manual       | 0.006                 | 0.002 | 0.004  | 0.002 | 0.003                 | 0.002 | 0.006  | 0.002 |
| Maximal PERCLOS  |              |                       |       |        |       |                       |       |        |       |
| Rested           | Automated    | 0.161                 | 0.028 | 0.147  | 0.029 | 0.142                 | 0.028 | 0.179  | 0.026 |
|                  | Manual       | 0.082                 | 0.026 | 0.102  | 0.026 | 0.165                 | 0.026 | 0.143  | 0.023 |
| Fatigued         | Automated    | 0.275                 | 0.041 | 0.268  | 0.042 | 0.220                 | 0.041 | 0.197  | 0.037 |
|                  | Manual       | 0.118                 | 0.032 | 0.167  | 0.033 | 0.156                 | 0.032 | 0.131  | 0.029 |
| Median PERCLOS   |              |                       |       |        |       |                       |       |        |       |
| Rested           | Automated    | 0.032                 | 0.016 | 0.027  | 0.016 | 0.026                 | 0.016 | 0.068  | 0.014 |
|                  | Manual       | 0.011                 | 0.010 | 0.026  | 0.010 | 0.024                 | 0.010 | 0.032  | 0.009 |
| Fatigued         | Automated    | 0.053                 | 0.018 | 0.064  | 0.018 | 0.069                 | 0.018 | 0.060  | 0.016 |
|                  | Manual       | 0.024                 | 0.010 | 0.031  | 0.010 | 0.020                 | 0.010 | 0.034  | 0.009 |
| Mean PERCLOS     |              |                       |       |        |       |                       |       |        |       |
| Rested           | Automated    | 0.042                 | 0.015 | 0.035  | 0.016 | 0.039                 | 0.015 | 0.072  | 0.014 |
|                  | Manual       | 0.015                 | 0.010 | 0.031  | 0.010 | 0.035                 | 0.010 | 0.040  | 0.009 |
| Fatigued         | Automated    | 0.075                 | 0.019 | 0.086  | 0.020 | 0.075                 | 0.019 | 0.072  | 0.017 |
|                  | Manual       | 0.031                 | 0.012 | 0.039  | 0.012 | 0.038                 | 0.012 | 0.041  | 0.011 |
| Variance PERCLOS |              |                       |       |        |       |                       |       |        |       |
| Rested           | Automated    | 0.002                 | 0.001 | 0.002  | 0.001 | 0.002                 | 0.001 | 0.004  | 0.001 |
|                  | Manual       | 0.000                 | 0.001 | 0.001  | 0.001 | 0.003                 | 0.001 | 0.002  | 0.001 |
| Fatigued         | Automated    | 0.010                 | 0.003 | 0.010  | 0.003 | 0.006                 | 0.003 | 0.007  | 0.003 |
|                  | Manual       | 0.001                 | 0.003 | 0.002  | 0.003 | 0.008                 | 0.003 | 0.003  | 0.003 |

Note: Data transformation by  $\ln(x+1)$  was used before calculating ANOVA. SD - Standard Deviation

**Table S3.** KSS self-ratings of female and male drivers from both age groups related to the baseline before-test, manual and automated driving in the rested and fatigued conditions.

| Condition | Baseline/Driving Mode | Age Group 20-49 Years |       |        |       | Age Group 50-85 Years |       |        |       |
|-----------|-----------------------|-----------------------|-------|--------|-------|-----------------------|-------|--------|-------|
|           |                       | Male                  |       | Female |       | Male                  |       | Female |       |
|           |                       | Mean                  | SD    | Mean   | SD    | Mean                  | SD    | Mean   | SD    |
| Rested    | Baseline              | 1.299                 | 0.071 | 1.277  | 0.080 | 1.141                 | 0.074 | 1.242  | 0.065 |
|           | Automated             | 1.717                 | 0.089 | 1.645  | 0.101 | 1.675                 | 0.094 | 1.730  | 0.083 |
|           | Manual                | 1.704                 | 0.085 | 1.771  | 0.096 | 1.578                 | 0.088 | 1.615  | 0.078 |
| Fatigued  | Baseline              | 1.997                 | 0.075 | 2.017  | 0.084 | 1.834                 | 0.078 | 1.677  | 0.069 |
|           | Automated             | 2.155                 | 0.066 | 2.18   | 0.074 | 2.093                 | 0.069 | 1.963  | 0.061 |
|           | Manual                | 2.130                 | 0.071 | 2.125  | 0.080 | 2.005                 | 0.074 | 1.871  | 0.065 |

Note: Data transformation by  $\ln(x+1)$  was used before calculating ANOVA. SD - Standard Deviation

**Table S4.** Reaction time (RT) of female and male drivers from both age groups related to manual and automated driving in the rested and fatigued conditions.

| Condition   | Driving Mode | Age Group 20-49 Years |       |        |       | Age Group 50-85 Years |       |        |       |
|-------------|--------------|-----------------------|-------|--------|-------|-----------------------|-------|--------|-------|
|             |              | Male                  |       | Female |       | Male                  |       | Female |       |
|             |              | Mean                  | SD    | Mean   | SD    | Mean                  | SD    | Mean   | SD    |
| Minimal RT  |              |                       |       |        |       |                       |       |        |       |
| Rested      | Automated    | 0.934                 | 0.137 | 0.874  | 0.158 | 1.047                 | 0.127 | 0.955  | 0.132 |
|             | Manual       | 0.902                 | 0.133 | 0.708  | 0.154 | 0.793                 | 0.123 | 0.848  | 0.128 |
| Fatigued    | Automated    | 0.964                 | 0.089 | 0.989  | 0.103 | 0.845                 | 0.083 | 0.912  | 0.086 |
|             | Manual       | 0.889                 | 0.059 | 0.829  | 0.068 | 0.714                 | 0.054 | 0.824  | 0.056 |
| Maximal RT  |              |                       |       |        |       |                       |       |        |       |
| Rested      | Automated    | 1.325                 | 0.244 | 1.397  | 0.281 | 1.529                 | 0.226 | 1.280  | 0.234 |
|             | Manual       | 1.103                 | 0.188 | 1.035  | 0.217 | 1.054                 | 0.174 | 1.248  | 0.180 |
| Fatigued    | Automated    | 1.269                 | 0.161 | 1.243  | 0.186 | 1.228                 | 0.149 | 1.307  | 0.154 |
|             | Manual       | 1.099                 | 0.122 | 1.175  | 0.140 | 1.058                 | 0.113 | 1.035  | 0.117 |
| Median RT   |              |                       |       |        |       |                       |       |        |       |
| Rested      | Automated    | 1.167                 | 0.174 | 0.976  | 0.201 | 1.254                 | 0.161 | 1.014  | 0.167 |
|             | Manual       | 0.986                 | 0.133 | 0.894  | 0.153 | 0.922                 | 0.123 | 0.965  | 0.128 |
| Fatigued    | Automated    | 1.099                 | 0.103 | 1.074  | 0.119 | 1.018                 | 0.096 | 1.062  | 0.099 |
|             | Manual       | 0.971                 | 0.064 | 0.923  | 0.074 | 0.870                 | 0.060 | 0.922  | 0.062 |
| Mean RT     |              |                       |       |        |       |                       |       |        |       |
| Rested      | Automated    | 1.180                 | 0.196 | 1.151  | 0.227 | 1.338                 | 0.182 | 1.127  | 0.189 |
|             | Manual       | 1.007                 | 0.154 | 0.897  | 0.178 | 0.934                 | 0.143 | 1.076  | 0.148 |
| Fatigued    | Automated    | 1.123                 | 0.121 | 1.115  | 0.140 | 1.065                 | 0.112 | 1.135  | 0.117 |
|             | Manual       | 0.992                 | 0.087 | 1.025  | 0.101 | 0.897                 | 0.081 | 0.934  | 0.084 |
| Variance RT |              |                       |       |        |       |                       |       |        |       |
| Rested      | Automated    | 0.774                 | 0.495 | 0.836  | 0.571 | 1.023                 | 0.458 | 0.495  | 0.475 |
|             | Manual       | 0.495                 | 0.349 | 0.188  | 0.403 | 0.399                 | 0.323 | 0.569  | 0.335 |
| Fatigued    | Automated    | 0.469                 | 0.304 | 0.358  | 0.351 | 0.514                 | 0.281 | 0.539  | 0.292 |
|             | Manual       | 0.152                 | 0.208 | 0.584  | 0.240 | 0.283                 | 0.192 | 0.144  | 0.200 |

Note: Data transformation by  $\ln(x+1)$  was used before calculating ANOVA. SD - Standard Deviation

**Table S5.** Non-parametric Spearman's coefficients of correlation between subjective fatigue, age, and PERCLOS (\* Indicates significant correlations at  $p < 0.05$ )

| Variable                                         | Correlation | Subjective Fatigue | Age    | Minimum PERCLOS | Maximum PERCLOS | Median PERCLOS | Mean PERCLOS | PERCLOS Variance |
|--------------------------------------------------|-------------|--------------------|--------|-----------------|-----------------|----------------|--------------|------------------|
| <b>Automated driving in a rested condition</b>   |             |                    |        |                 |                 |                |              |                  |
| Effort                                           | Rho         | .428*              | .089   | .211*           | -.002           | .077           | .013         | -.027            |
|                                                  | p           | .0001              | .202   | .03             | .493            | .247           | .455         | .406             |
|                                                  | N           | 89                 | 89     | 80              | 80              | 80             | 80           | 80               |
| Subjective Fatigue                               | Rho         |                    | -.061  | .244*           | .149            | .18            | .178         | .154             |
|                                                  | p           |                    | .284   | .015            | .094            | .055           | .057         | .087             |
|                                                  | N           |                    | 89     | 80              | 80              | 80             | 80           | 80               |
| Age                                              | Rho         |                    |        | -.123           | .048            | -.113          | -.072        | .028             |
|                                                  | p           |                    |        | .139            | .337            | .158           | .264         | .402             |
|                                                  | N           |                    |        | 80              | 80              | 80             | 80           | 80               |
| <b>Automated driving in a fatigued condition</b> |             |                    |        |                 |                 |                |              |                  |
| Effort                                           | Rho         | .288*              | .029   | .023            | .0              | .008           | .007         | .011             |
|                                                  | p           | .003               | .394   | .42             | .5              | .472           | .474         | .462             |
|                                                  | N           | 89                 | 89     | 81              | 81              | 81             | 81           | 81               |
| Subjective Fatigue                               | Rho         |                    | -.193* | .102            | .356*           | .367*          | .376*        | .404*            |
|                                                  | p           |                    | .035   | .183            | .001            | .0001          | .0001        | .0001            |
|                                                  | N           |                    | 89     | 81              | 81              | 81             | 81           | 81               |
| Age                                              | Rho         |                    |        | -.144           | -.256*          | -.221*         | -.257*       | -.251*           |
|                                                  | p           |                    |        | .1              | .01             | .024           | .01          | .012             |
|                                                  | N           |                    |        | 81              | 81              | 81             | 81           | 81               |
| <b>Manual driving in a rested condition</b>      |             |                    |        |                 |                 |                |              |                  |
| Effort                                           | Rho         | .439*              | -.049  | .047            | .073            | .034           | .111         | .091             |
|                                                  | p           | .0001              | .325   | .338            | .26             | .382           | .165         | .211             |
|                                                  | N           | 89                 | 89     | 80              | 80              | 80             | 80           | 80               |
| Subjective Fatigue                               | Rho         |                    | -.123  | .082            | -.077           | .094           | .063         | -.063            |
|                                                  | p           |                    | .125   | .236            | .248            | .203           | .288         | .29              |
|                                                  | N           |                    | 89     | 80              | 80              | 80             | 80           | 80               |
| Age                                              | Rho         |                    |        | .031            | .192*           | -.002          | .103         | .179             |
|                                                  | p           |                    |        | .394            | .044            | .493           | .182         | .056             |
|                                                  | N           |                    |        | 80              | 80              | 80             | 80           | 80               |
| <b>Manual driving in a fatigued condition</b>    |             |                    |        |                 |                 |                |              |                  |
| Effort                                           | Rho         | .432*              | -.139  | .134            | .148            | .175           | .184         | .162             |
|                                                  | p           | .0001              | .098   | .117            | .095            | .061           | .051         | .076             |
|                                                  | N           | 89                 | 89     | 80              | 80              | 80             | 80           | 80               |
| Subjective Fatigue                               | Rho         |                    | -.308* | .128            | .308*           | .258*          | .291*        | .317*            |
|                                                  | p           |                    | .002   | .129            | .003            | .01            | .004         | .002             |
|                                                  | N           |                    | 89     | 80              | 80              | 80             | 80           | 80               |
| Age                                              | Rho         |                    |        | -.083           | -.225*          | -.17           | -.165        | -.199*           |
|                                                  | p           |                    |        | .232            | .023            | .065           | .071         | .038             |
|                                                  | N           |                    |        | 80              | 80              | 80             | 80           | 80               |
